# Supplementary material for: Ultrathin 2D flower-like CoP@C with the active (211) facet for efficient electrocatalytic water splitting
Source: Royal Society of Chemistry journal article supplement (doi:10.1039/d0ce01757d), 2021-01-01
Supplement: d0ce01757d1.pdf [file d0ce01757d1.pdf]

## Ultrathin 2D Flower-Like CoP@C with Active (211) Facet for Efficient Electrocatalytic Water Splitting

Xiaowei Shi,<sup>a</sup> Ping Yang,<sup>a</sup> Yongyong Cao,<sup>b</sup> Chao Dai,<sup>a</sup> Weiqing Ye,<sup>a</sup> Lingxia Zheng,<sup>a</sup> Zhefei

Zhao,<sup>a</sup> Jianguo Wang,<sup>\*b</sup> and Huajun Zheng<sup>\*a</sup>

<sup>a</sup>Department of Applied chemistry, Zhejiang University of Technology,

Hangzhou 310032, P. R. China

E-mail: [zhenghj@zjut.edu.cn](mailto:zhenghj@zjut.edu.cn)

<sup>b</sup>Institute of Industrial Catalysis, College of Chemical Engineering, State Key Laboratory

Breeding Base of Green-Chemical Synthesis Technology, Zhejiang University of Technology,

Hangzhou 310032, P. R. China

E-mail: [jgw@zjut.edu.cn](mailto:jgw@zjut.edu.cn)

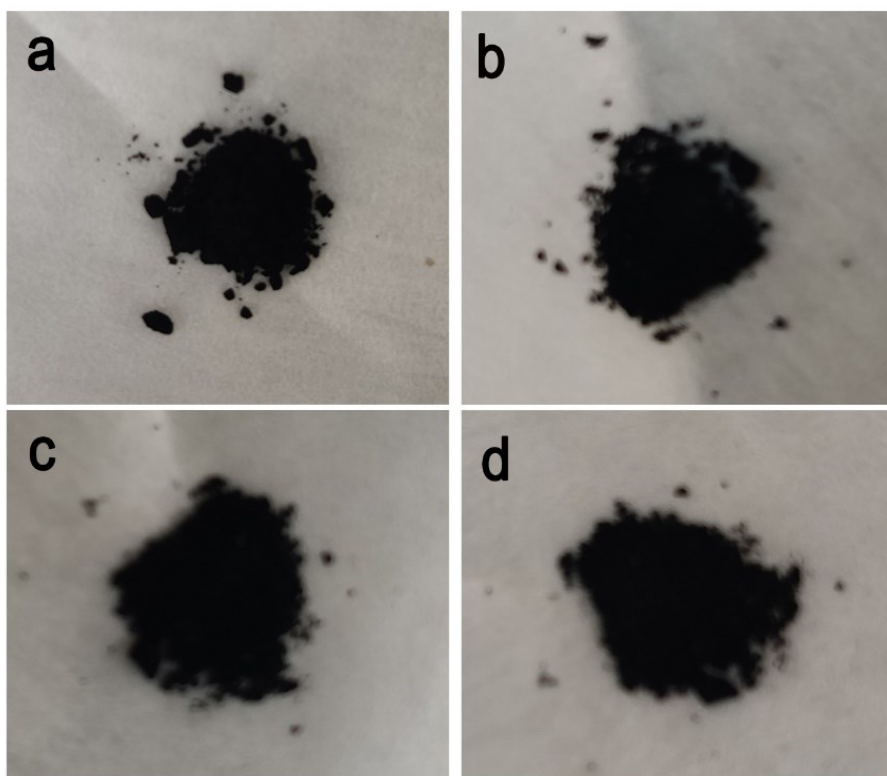

**Fig. S1.** The digital images of CoP@C-Y prepared in different proportion of  $\text{Co}^{2+}$  and 2-MeIM, CoP@C-1 (a), CoP@C-2 (b), CoP@C-3 (c) and CoP@C-4 (d).

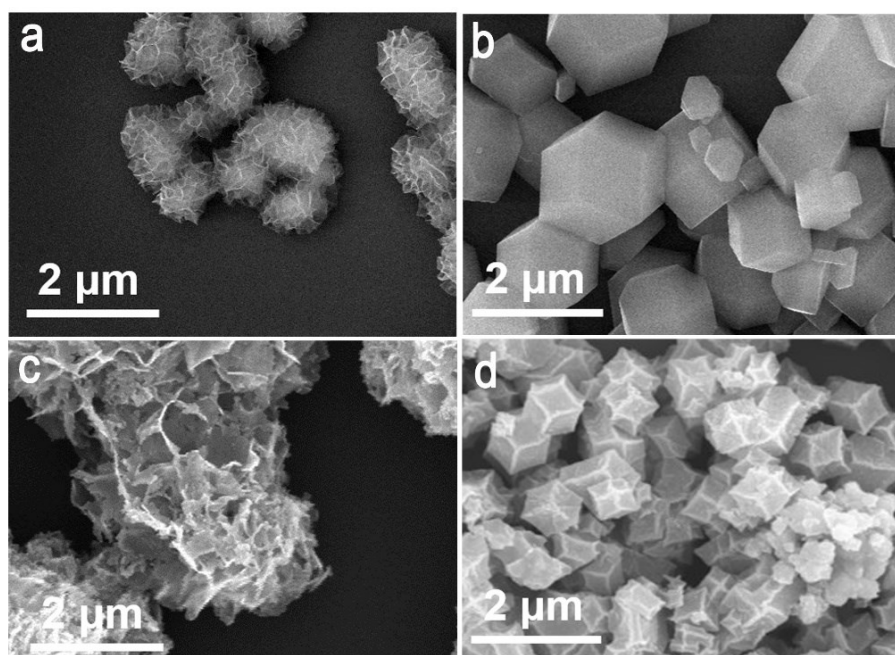

**Fig. S2.** SEM images of Co-MOF-1 (a), Co-MOF-3 (b), CoP@C-1 (c) and CoP@C-3 (d).

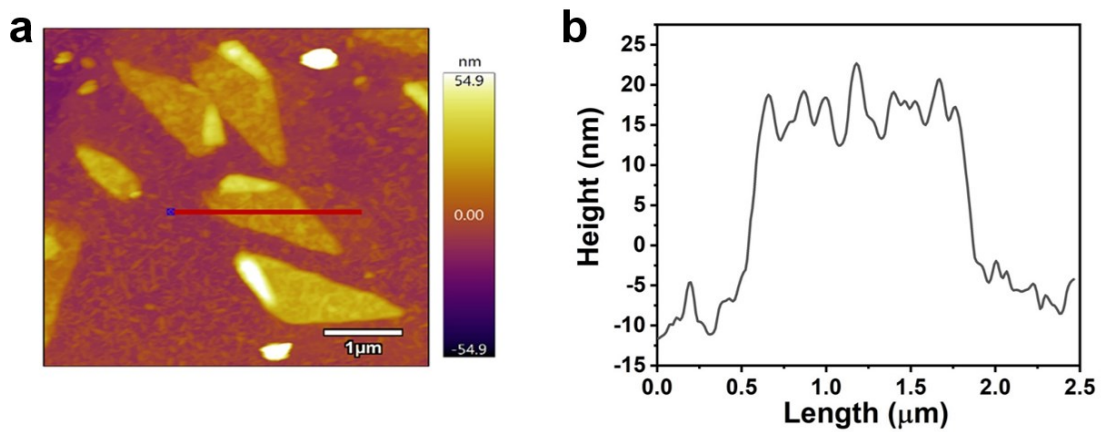

**Fig.S3.** AFM images and the corresponding height profiles of the CoP@C-2.

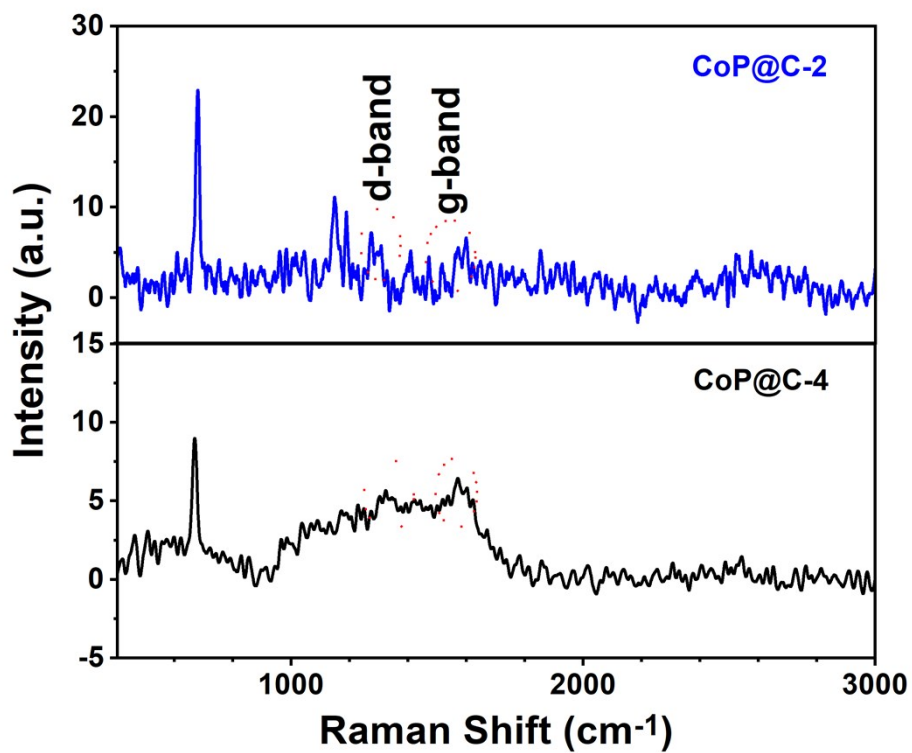

**Fig. S4.** Raman spectrum of the CoP@C-2 and CoP@C-4.

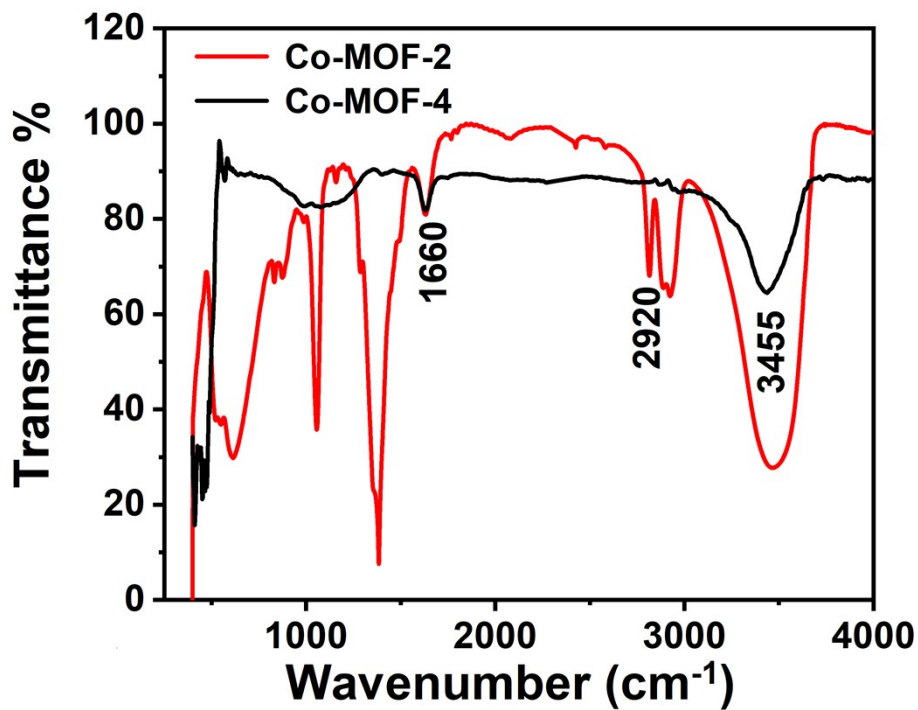

Fig. S5. FT-IR spectrums of Co-MOF-2 and Co-MOF-4.

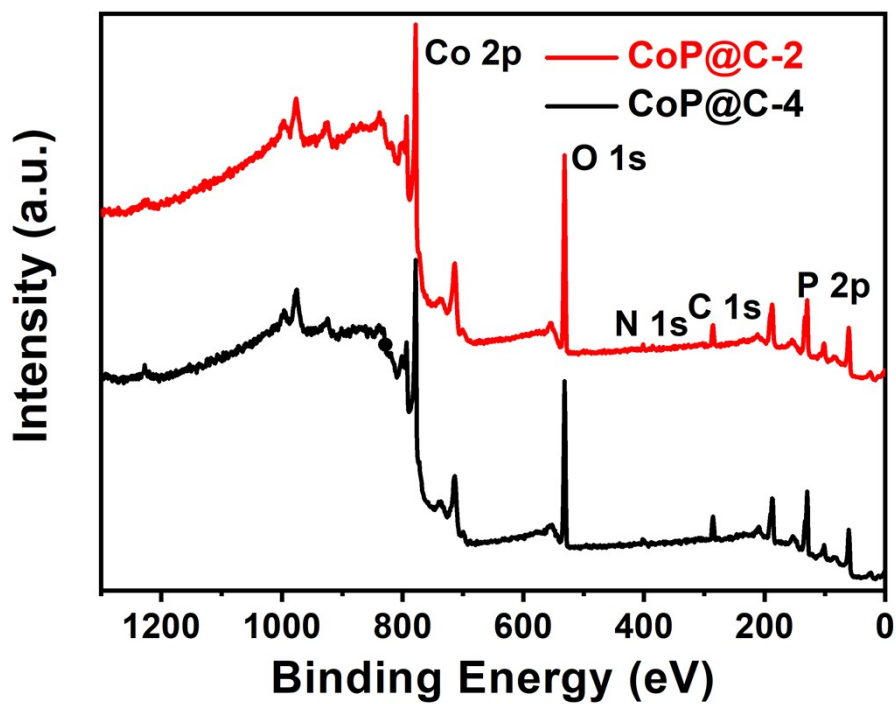

Fig. S6. XPS survey spectra of CoP@C-2 and CoP@C-4.

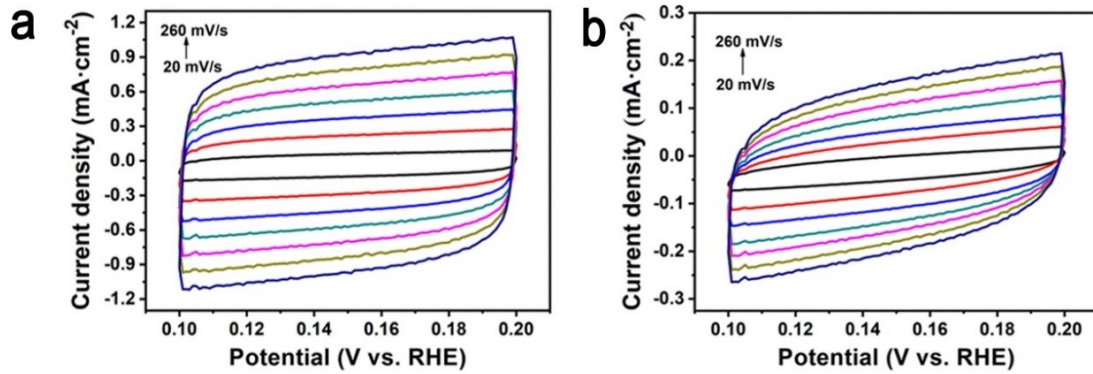

**Fig. S7.** The CV curves of the CoP@C at different sweep speeds in 1 M KOH, CoP@C-2 (a) and CoP@C-4 (b).

### The Faradaic Efficiency calculations (FE):<sup>1, 2</sup>

The Faradaic Efficiency was tested by drainage method, CoP@C-2 on Ni foam (1×1 cm<sup>2</sup>) at room temperature. H<sub>2</sub> was gathered use chronopotentiometry conducted at 10 mA·cm<sup>-2</sup> in the self-regulating cell with gas collecting plant. The Faradaic Efficiency calculation formula is as follows:

$$FE = \frac{\alpha n F}{Q}$$

In which  $\alpha$  is the numbers of transferred electrons,  $n$  is the number of moles of the obtained products,  $F$  is the faradaic constant (96485),  $Q$  is the total charge. The total charge  $Q$  is determined by the applied current and the operating time,  $Q = I \times t$ ,  $n$  can be obtained by the volume of H<sub>2</sub> (V),  $n = V / 24.5$ , (The molar volume of the gas is 24.5 L·mol<sup>-1</sup> at 25 °C). So, the actual Faradaic Efficiency calculation formula is as follows:

$$FE = \frac{\alpha V F}{I t \times 24.5}$$

The production rate of H<sub>2</sub> is expressed by the following equation:

$$r(H_2) = \frac{V}{24.5t}$$

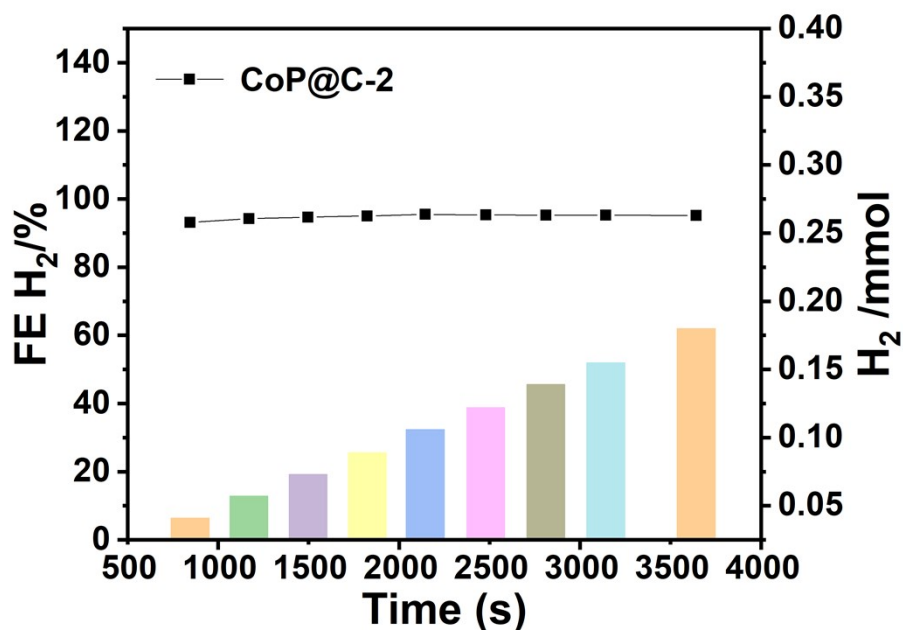

Fig. S8. Gas volume versus time and corresponding Faradaic efficiency.

#### Turnover frequency calculations (TOF):

The turnover frequency (TOF) was first calculated:<sup>3</sup>

$$TOF = \frac{j \cdot S}{2F \cdot n}$$

Where  $j$  is the current density ( $\text{mA} \cdot \text{cm}^{-2}$ ) at different overpotential,  $S$  represents the surface area of as prepared electrode ( $0.07 \text{ cm}^2$ ), the number 2 means a two-electron hydrogen evolution reaction,  $F$  is the Faraday's constant ( $96485.3 \text{ C} \cdot \text{mol}^{-1}$ ), and  $n$  represents the moles of metal atoms on the electrode.

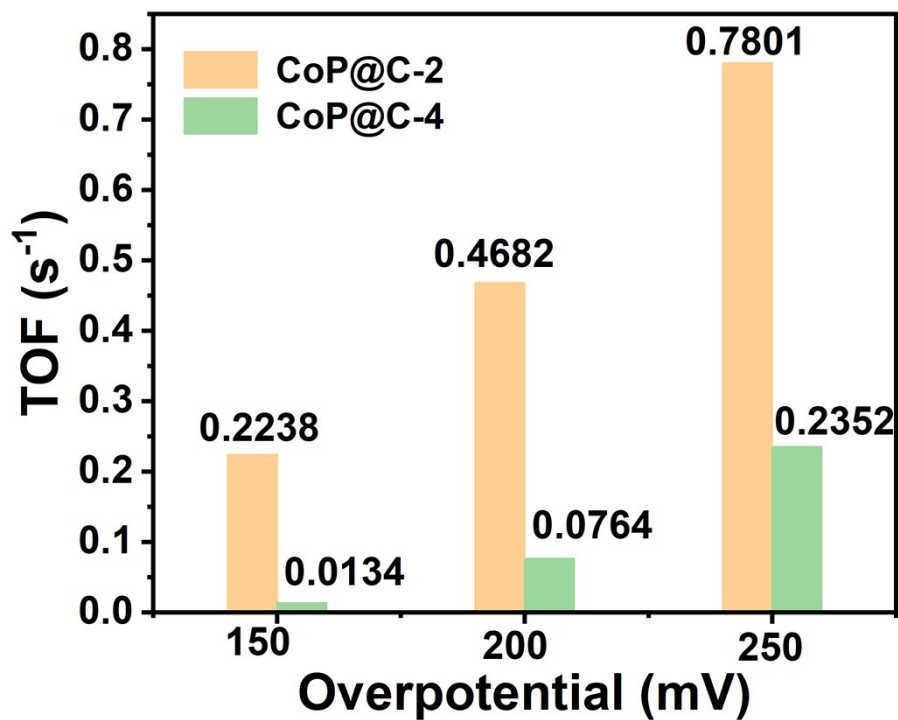

Fig. S9. The TOF values of different electrodes at 150, 200 and 250 mV (vs. RHE).

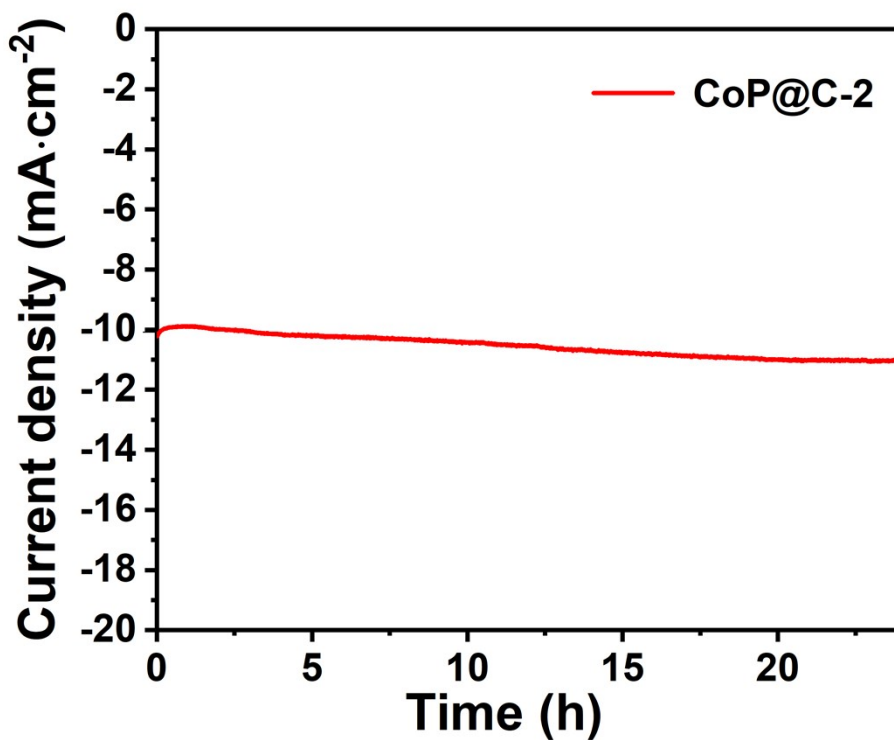

Fig. S10. Chronamperometric curves of the CoP@C-2 at 10 mAcm<sup>-2</sup>.

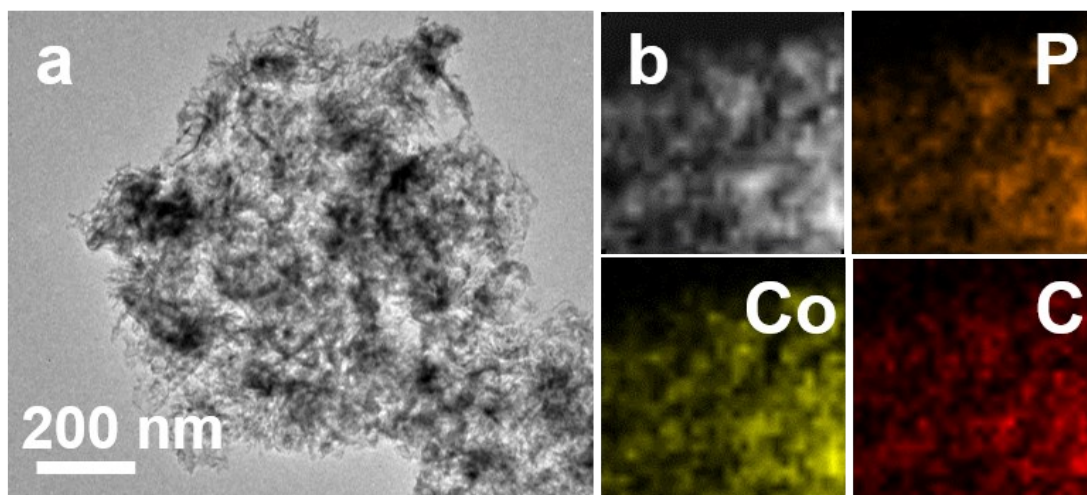

Fig. S11. TEM (a) and the elemental mapping (b) images of CoP@C-2 after stability testing.

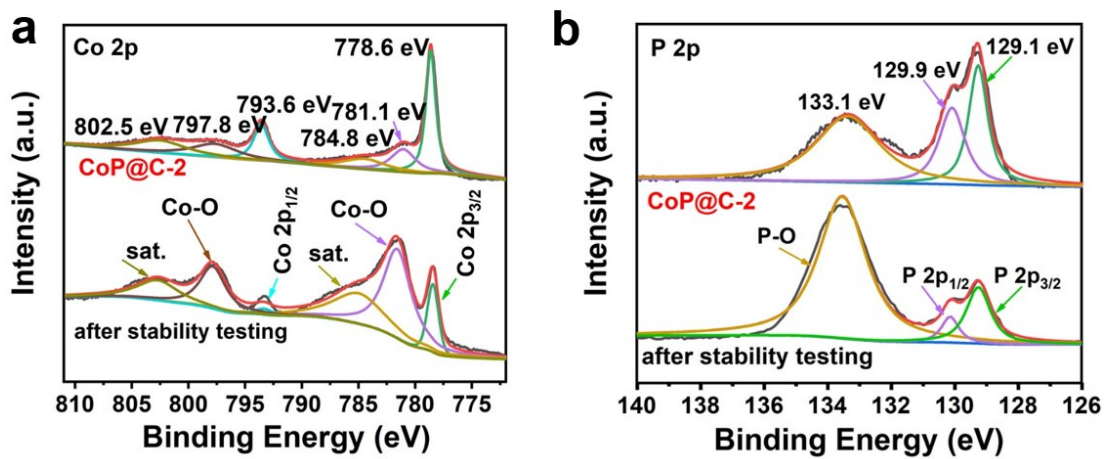

Fig. S12. The XPS of CoP@C-2 after the stability testing in 1.0 M KOH.



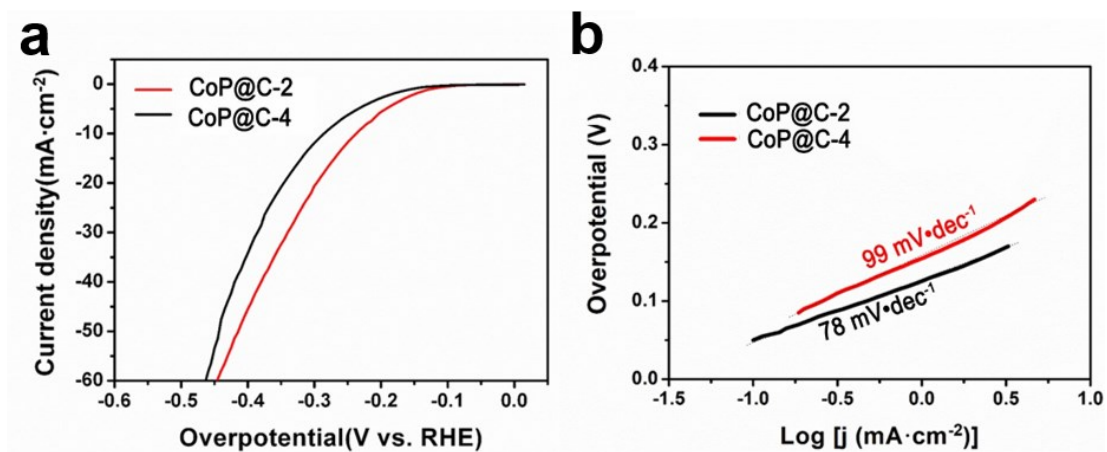

**Fig. S13.** (a) LSV curves, (b) Tafel slope of CoP@C-2 and CoP@C-4 in 0.5 M H<sub>2</sub>SO<sub>4</sub>.

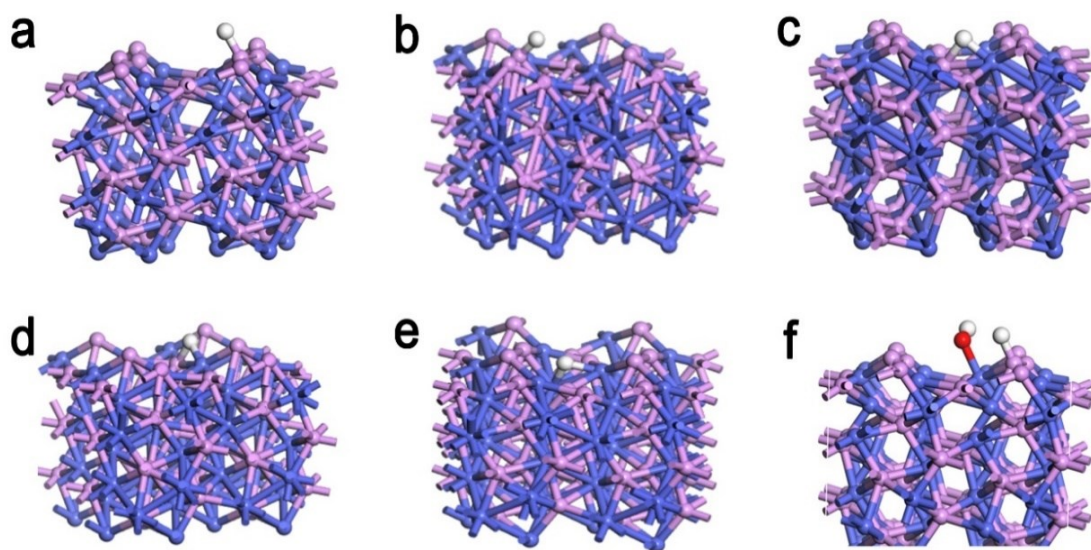

**Fig. S14.** The optimized structures of (a)-(e) hydrogen proton adsorption and (f) H<sub>2</sub>O dissociation on CoP (011).

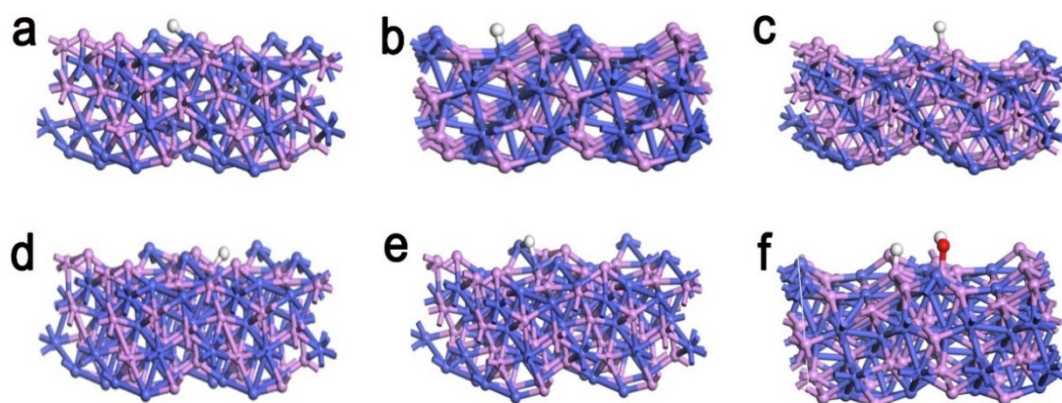

**Fig. S15.** The optimized structures of (a)-(e) hydrogen proton adsorption and (f) H<sub>2</sub>O dissociation on CoP (221).

**Table S1** the peak strength ration of the CoP@C crystal plane (011) and (211).

| Molar Ratio | Crystal Plane (011) | Crystal Plane (211) | the Peak Intensity ratio |
|-------------|---------------------|---------------------|--------------------------|
| CoP@C-2     | 305                 | 421                 | 18:25                    |
| CoP@C-4     | 753                 | 625                 | 6:5                      |

**Table S2** the peak strength ration of the CoP@C crystal plane (112) and (011).

| Molar Ratio | Crystal Plane (112) | Crystal Plane (011) | the Peak Intensity ratio |
|-------------|---------------------|---------------------|--------------------------|
| CoP@C-2     | 127                 | 305                 | 21:50                    |
| CoP@C-4     | 271                 | 753                 | 9:25                     |

**Table S3** Electrochemical Parameters of the catalysts for HER in 1 M KOH.

| Catalyst                 | Substrate          | Overpotential at 10mA·cm <sup>-2</sup> (mV) | Tafel Slope (mV·dec <sup>-1</sup> ) | Ref       |
|--------------------------|--------------------|---------------------------------------------|-------------------------------------|-----------|
| CoP                      | Carbon cloth       | 209                                         | 129                                 | [4]       |
| Ni <sub>2</sub> P        | Ni foam            | 98                                          | 72                                  | [5]       |
| CoP@NC                   | GCE                | 129                                         | 58                                  | [6]       |
| CoP <sub>3</sub> NAs/CFP | Carbon fiber paper | 65                                          | 46                                  | [7]       |
| CoP/CP                   | Carbon paper       | 128                                         | 62                                  | [8]       |
| CoP <sub>2</sub> /RGO    | RGO                | 88                                          | 50                                  | [9]       |
| Ni <sub>2</sub> P/C      | Ni foam            | 97                                          | 29                                  | [10]      |
| FeP/C                    |                    | 185                                         | 93                                  | [11]      |
| CoP NS/C                 |                    | 111                                         | 70.9                                | [12]      |
| CoP/TF                   | Ti foil            | 118                                         | 50                                  | [13]      |
| CoP@C                    |                    | 127                                         | 78                                  | This work |

**Table S4** Electrochemical Parameters of the catalysts for HER in 0.5 M H<sub>2</sub>SO<sub>4</sub>.

| Catalyst       | Substrate    | Overpotential at 10mA·cm <sup>-2</sup> (mV) | Tafel Slope (mV·dec <sup>-1</sup> ) | Ref       |
|----------------|--------------|---------------------------------------------|-------------------------------------|-----------|
| CoP            | Ti foil      | 77                                          | 50                                  | [14]      |
| g-CoP@NF VDNCs | Ni foam      | 71                                          | 46.7                                | [15]      |
| CoP@PCM        | Natural wood | 155                                         | 58.8                                | [16]      |
| CoP@CNT        |              | 122                                         | 54                                  | [17]      |
| CoP-CNTs       |              | 139                                         | 52                                  | [18]      |
| CoP/CC         | Carbon cloth | 95                                          | 119                                 | [19]      |
| CoP@NPMG       |              | 146                                         | 58                                  | [20]      |
| CoP/C          |              | 90                                          | 128                                 | [21]      |
| CoP-CNT        |              | 119                                         | 64                                  | [22]      |
| V,N-CoP/CC     | Carbon cloth | 81                                          | 59                                  | [23]      |
| CoP@C          |              | 236                                         | 78                                  | This work |

**Table S5** The adsorption energy of hydrogen proton on different active sites of CoP (011) and CoP (211).

| CoP(011) Active Sites | Adsorption Energy(eV) | CoP(211) Active Sites | Adsorption Energy(eV) |
|-----------------------|-----------------------|-----------------------|-----------------------|
| Top-1(P) site         | -0.39                 | Top-1(Co) site        | -0.17                 |
| Top-2(P) site         | -0.30                 | Top-2(Co) site        | 0.02                  |
| Bridge-1(P-Co) site   | 0.25                  | Top-1(P) site         | -0.27                 |
| Bridge-2(P-Co) site   | 0.08                  | Top-2(P) site         | 0.09                  |
| Bridge(Co-Co) site    | 0.66                  | Bridge(Co-Co) site    | -0.11                 |

**Table S6** Summary of various catalytic electrodes for overall water splitting in 1 M KOH.

| Catalyst                                         | Cell Voltages<br>$\eta=10 \text{ mA}\cdot\text{cm}^{-2}$ (V) | Ref       |
|--------------------------------------------------|--------------------------------------------------------------|-----------|
| Mo-CoP                                           | 1.56                                                         | [24]      |
| CoP/NFs                                          | 1.7                                                          | [25]      |
| CoP/NCNHP                                        | 1.64                                                         | [26]      |
| FeCoP                                            | 1.60                                                         | [27]      |
| CP/CNTs/Co-S                                     | 1.74                                                         | [28]      |
| Co <sub>2</sub> P                                | 1.65                                                         | [29]      |
| Co <sub>2</sub> P@Co <sub>3</sub> O <sub>4</sub> | 1.57                                                         | [30]      |
| C-CoP-1/12                                       | 1.65                                                         | [31]      |
| CoP-Co <sub>2</sub> P@PC                         | 1.56                                                         | [32]      |
| Er-doped CoP                                     | 1.58                                                         | [33]      |
| CoP@C                                            | 1.67                                                         | This work |

## References

- 1 Y. Men, P. Li, F. Yang, G. Cheng, S. Chen, W. Luo, *Appl. Catal. B: Environ.*, 2019, **253**, 21-27.
- 2 Z. Wang, H. Wang, S. Ji, X. Wang, P. Zhou, S. Huo, V. Linkov, R. Wang, *Chem. Eur. J.* 2020, **26**, 12067-12074.
- 3 P. Li, X. Duan, Y. Kuang, Y. Li, G. Zhang, W. Liu, X. Sun, *Adv. Energy Mater.*, 2018, 1703341.
- 4 Z. Pu, Q. Liu, A. M. Asiri, X. Sun, *ACS Appl. Mater. Interfaces*, 2014, **6**, 21874.
- 5 E. J. Popczun, C. W. Roske, C. G. Read, J. C. Crompton, J. M. McEnaney, J. F. Callejas, N. S. Lewis, R. E. Schaak, *J. Mater. Chem. A*, 2015, **3**, 5420.
- 6 F. Yang, Y. Chen, G. Cheng, S. Chen, W. Luo, *ACS Catal.*, 2017, **7**, 3824.
- 7 T. Wu, M. Pi, D. Zhang, S. Chen, *J. Mater. Chem. A*, 2016, **4**, 14539.
- 8 Y. Zeng, Y. Wang, G. Huang, C. Chen, L. Huang, R. Chen, S. Wang, *Chem. Commun.*, 2018, **54**, 1465.
- 9 J. Wang, W. Yang, J. Liu, *J. Mater. Chem. A*, 2016, **4**, 4686.
- 10 H. Qu, Y. Ma, Z. Gou, B. Li, Y. Liu, Z. Zhang, L. Wang, *J. Colloid Interf. Sci.*, 2020, **572**, 83.
- 11 F. Wang, X. Yang, B. Dong, X. Yu, H. Xue, L. Feng, *Electrochem. Commun.*, 2018, **92**, 33.
- 12 J. Chang, L. Liang, C. Li, M. Wang, J. Ge, C. Liu, W. Xing, *Green Chem.*, 2016, **18**, 2287.
- 13 X. Huang, X. Xu, C. Li, D. Wu, D. Cheng, D. Cao, *Adv. Energy Mater.*, 2019, **9**, 1803970.
- 14 J. F. Callejas, C. G. Read, E. J. Popczun, J. M. McEnaney, R. E. Schaak, *Chem. Mater.*, 2015, **27**, 3769.
- 15 K. Ge, Y. Zeng, G. Dong, L. Zhao, Z. Wang, M. Huang, *Int. J. Hydrogen Energy*, 2019, **44**, 13490.
- 16 S. Min, W. Deng, Y. Li, F. Wang, Z. Zhang, *ChemCatChem*, 2020, **12**, 1.
- 17 Q. Liu, J. Tian, W. Cui, P. Jiang, N. Cheng, A. M. Asiri, X. Sun, *Angew. Chem. Int. Ed.*, 2014, **53**, 6710.
- 18 C. Wu, Y. Yang, D. Dong, Y. Zhang, J. Li, *Small*, 2017, **13**, 1602873.
- 19 P. Wang, F. Song, R. Amal, Y. H. Ng, X. Hu, *ChemSusChem*, 2016, **9**, 472.
- 20 Y. Liu, Y. Zhu, J. Shen, J. Huang, X. Yang, C. Li, *Nanoscale*, 2018, **10**, 2603.
- 21 W. Wang, J. Li, M. Bi, Y. Zhao, M. Chen, Z. Fang, *Electrochim. Acta*, 2018, **259**, 822.
- 22 J. K. Kim, S.-K. Park, Y. C. Kang, *J. Alloys Compd.*, 2018, **763**, 652.
- 23 W. Zhang, Y. Sun, Q. Liu, J. Guo, X. Zhang, *J. Alloys Compd.*, 2019, **791**, 1070.
- 24 C. Guan, W. Xiao, H. Wu, X. Liu, W. Zang, H. Zhang, J. Ding, Y. P. Feng, S. J. Pennycook, J. Wang, *Nano Energy*, 2018, **48**, 73.
- 25 L. Ji, J. Wang, X. Teng, T. J. Meyer, Z. Chen, *ACS Catal.*, 2019, **10**, 412.
- 26 Y. Pan, K. Sun, S. Liu, X. Cao, K. Wu, W. C. Cheong, Z. Chen, Y. Wang, Y. Li, Y. Liu, D. Wang, Q. Peng, C. Chen, Y. Li, *J. Am. Chem. Soc.*, 2018, **140**, 2610.
- 27 L. Zhou, M. Shao, J. Li, S. Jiang, M. Wei, X. Duan, *Nano Energy*, 2017, **41**, 583.
- 28 J. Wang, H. X. Zhong, Z. L. Wang, F. L. Meng, X. B. Zhang, *ACS Nano*, 2016, **10**, 2342.
- 29 M. Song, Y. He, M. Zhang, X. Zheng, Y. Wang, J. Zhang, X. Han, C. Zhong, W. Hu, Y. Deng, *J. Power Sources*, 2018, **402**, 345.
- 30 L. Yao, N. Zhang, Y. Wang, Y. Ni, D. Yan, C. Hu, *J. Power Sources*, 2018, **374**, 142.
- 31 W. Li, G. Cheng, M. Sun, Z. Wu, G. Liu, D. Su, B. Lan, S. Mai, L. Chen, L. Yu, *Nanoscale*, 2019, **11**, 17084.
- 32 J. Yang, D. Guo, S. Zhao, Y. Lin, R. Yang, D. Xu, N. Shi, X. Zhang, L. Lu, Y. Q. Lan, J. Bao, M. Han, *Small*, 2019, **15**, 1804546.
- 33 G. Zhang, B. Wang, J. Bi, D. Fang, S. Yang, *J. Mater. Chem. A*, 2019, **7**, 5769.
